# Supplementary material
Source: publisher site journal article supplement (https://www.dovepress.com/article/422632)
Supplement: Supplementary file 1 [file get_supplementary_file.php]

# Table S1. MRI acquisition protocol two MR scans

| Parameters | Titan 3T,Toshiba | | |  | Prisma 3.0T,Siemens | | |
| --- | --- | --- | --- | --- | --- | --- | --- |
| T1WI | T2WI | Dynamic enhance T1WI |  | T1WI | T2WI | dynamic enhance T1WI |
| Repetition time(ms) | 3.7 | 2000 | 3.7 |  | 3.97 | 1500 | 3.97 |
| Echo time(ms) | 1.3 | 75 | 1.3 |  | 1.29/2.52 | 102 | 1.23/2.46 |
| Flip angle(deg) | 15 | 90 | 15 |  | 9.0 | 160 | 9.0 |
| Matrix | 160×224 | 224×320 | 160×224 |  | 195×320 | 216×320 | 141×256 |
| Slice thickness(mm) | 5.5 | 6.5 | 5.5 |  | 3.0 | 6.0 | 2.0 |
| Field of view | 350×380 | 350×380 | 350×380 |  | 380×380 | 380×380 | 380×380 |

**Table S2. Definition of imaging features of Gd-EOB-DTPA enhanced MRI**

| MRI Features | Definition |
| --- | --- |
| **Nonenhanced image** |  |
| Tumor diameter | The largest outer-edge-to-outer-edge dimension of an observation, including the capsule if present. |
| Intratumoral necrosis | Non-enhanced areas with attenuation similar to that of gallbladder contents and as signal hyperintensity on T2WI. |
| Intratumoral bleeding | High signal intensity foci on T1WI without signal reduction on inverse-phase or fat-suppressed images. |
| Intratumoral fat | Tumor area with decreased signal intensity on opposed-phase images compared with in-phase images. |
| Radiological  capsule | A smooth, uniform and sharp ring around the whole lesion or most of the focus, and its thickness is larger than that of hepatic background fibrosis. |
| Mosaic sign | Numerous randomly distributed internal nodules or lacunar structures separated by fibrous separations, vary in shape, size, enhancement, attenuation, intensity. |
| **Arterial phase** |  |
| Corona enhancement | Peritumoral enhancement in the late arterial or portal venous phase. |
| Intratumoral artery | The discrete artery in the tumor in the arterial phase image. |
| Low vascular composition | The enhancement degree of arterial phase tumor is lower than that of surrounding tumor-free liver parenchyma. |
| **Hepatobiliary phase** |  |
| Peritumoral hypointensity | Irregular, wedge-shaped or a flame-like hypointense area of liver parenchyma outside the tumor margin, it usually with a lower intensity than liver parenchyma but a higher intensity than the tumor. |
| Increased uptake | Equal or high signal uptake in hepatobiliary phase exceeding 2/3 of tumor volume. |
| Nonsmooth tumor margin | The margin of tumor in the hepatobiliary stage is irregular, and it is considered to exist when there are budding parts around the tumor that protrude toward the liver parenchyma. |
| Satellite nodule | Tumors≤2 cm in size and located≤2 cm from the main tumor. |

**Table S3. Clinical and pathological characteristics of MVI-positive and MVI-negative in patients without peritumoral HBP hypointensity**

| **Characteristic** | **MVI positive(n=48)** | **MVI negative(n=61)** | ***P* value** |
| --- | --- | --- | --- |
| Age (year) | 55.6±11.6 | 55.2±10.4 | 0.863 |
| Gender |  |  | 0.144 |
| Female | 4(8.3%) | 11 (18.0%) |  |
| Male | 44(91.7%) | 50 (82.0%) |  |
| WBC (×109/L) | 5.85(5.10-6.96) | 5.67(4.36-6.87) | 0.544 |
| RBC (×1012/L) | 4.63±0.63 | 4.74±0.67 | 0.399 |
| HG (g/L) | 144(128-154) | 142(130-153) | 0.744 |
| PLT (×109/L) | 167(134-199) | 174(129-212) | 0.884 |
| PT(s) | 12.9±1.3 | 13.3±1.3 | 0.145 |
| INR(R) | 1.02(0.95-1.09) | 1.04(0.97-1.11) | 0.312 |
| APTT(s) | 35.4(28.1-39.7) | 36.8(34.4-39.7) | 0.311 |
| FIB(g/L) | 2.90(2.52-3.41) | 2.86(2.47-3.33) | 0.730 |
| ALT (U/L) | 26.0(20.0-41.5) | 25.0(18.0-41.0) | 0.595 |
| AST (U/L) | 28.5(20.5-50.0) | 26.0(22.0-38.0) | 0.812 |
| ALB(g/L) | 43.4±4.3 | 43.2±4.4 | 0.820 |
| GLB(g/L) | 28.3±3.5 | 29.0±4.6 | 0.630 |
| ALP(U/L) | 78(65.5-109.5) | 83.0(67.0-106.0) | 0.728 |
| GGT(U/L) | 47.5(30.0-86.0) | 44.0(25.0-77.0) | 0.687 |
| TBIL(μmol/L) | 11.8(8.4-15.7) | 12.3(8.4-16.2) | 0.959 |
| Cr(μmol/L) | 80.0(71.0-89.5) | 80.0(68.0-88.0) | 0.658 |
| AFP(ng/ml) | 25.9(4.2-332.3) | 15.2(4.9-189.2) | 0.983 |
| CTP | 5.0(5.0-6.0) | 5.0(5.0-6.0) | 0.395 |
| MELD | 4.26±2.69 | 4.19±3.58 | 0.902 |
| Edmondson grade |  |  | <0.001 |
| Ⅰ | 1 (2.1%) | 4 (6.6%) |  |
| Ⅱ | 17 (27.1%) | 37 (60.7%) |  |
| Ⅲ | 37 (56.3%) | 19 (31.1%) |  |
| Ⅳ | 8 (14.6%) | 1 (1.6%) |  |

*Abbreviation:* WBC, white blood cell count; RBC, red blood cell count; HB hemoglobin; PLT, platelets; ALT, alanine aminotransferase; PT, prothrombin time;INR, international normalized ratio of prothrombin; APTT, activated partial thromboplastin time, FIB, fibrinogen, AST, aspartate aminotransaminase; ALB, albumin; GLB, globulin; ALP, alkaline phosphatase; GGT, gamma-glutamyl transferase; TBIL, total bilirubin; Cr, albumin creatinine;AFP, serum alpha-fetoprotein; CTP, Child-Turcotte-Pugh stage; MELD, model for end-stage liver disease score.

*Note:* Chi-square test or Fisher exact probability test, as appropriate, were used to compare the difference in categorical variables among different groups. Student t test or Mann-Whitney U test, as appropriate, were used to compare the difference in continuous variables*.*

**Table S4. Univatiate and multivariate Cox regression of MRI features in predicting intrahepatic recurrence in whole cohort**

| **Imaging feature** | **Univariable Analysis** | |  | **Multivariable Analysis** | |
| --- | --- | --- | --- | --- | --- |
| Hazard Ratio(95%CI) | *P* value | Hazard Ratio(95%CI) | *P* value |
| Gender | 1.387(0.545-3.531) | 0.493 |  | - | - |
| Age | 0.997(0.971-1.025) | 0.852 |  | - | - |
| Tumor size >5.0 | 4.032(1.734-9.372) | 0.001 |  | 3.588(1.438-8.954) | 0.006 |
| Nonsmooth tumor margin | 2.453(1.226-4.904) | 0.011 |  | - | - |
| Radiological capsule | 0.945(0.484-1.844) | 0.869 |  | - | - |
| Mosaic sign | 1.900(1.085-3.329) | 0.025 |  | - | - |
| Intratumoral necrosis | 3.109（1.774-5.448） | <0.001 |  | 2.155(1.066-4.354) | 0.032 |
| Intratumoral bleeding | 2.058（1.181-3.587） | 0.011 |  | - | - |
| Intratumoral fat | 1.103（0.516-2.357） | 0.800 |  | - | - |
| Low vascular composition | 1.467（1.040-2.070） | 0.029 |  | - | - |
| Intratumoral artery | 1.540（0.881-2.691） | 0.130 |  | 0.252(0.114-0.557) | 0.001 |
| Satellite nodule | 3.401（1.932-5.989） | 0.000 |  | 2.560(1.278-5.129) | 0.008 |
| Corona enhancement | 0.771（0.347-1.713） | 0.523 |  | - | - |
| Peritumoral hypointensity | 2.762（1.427-5.346） | 0.003 |  | 2.381(1.162-4.881) | 0.018 |
| Increased uptake in HBP | 0.637（0.155-2.622） | 0.532 |  | - | - |

Abbreviation: CI, confidence interval.
